# Supplementary material
Source: HighWire-hosted journal article supplement (https://err.ersjournals.com/content/29/158/190171)
Supplement: inline-supplementary-material-1 [file inline-supplementary-material-1.pdf]

## **Online supplement**

Supplement to: Marlies van Dijk, Karin Klooster, Nick H.T. Ten Hacken, F Scirba, Huib. A.M.

Kerstjens, Dirk-Jan Slebos. The effects of lung volume reduction treatment on diffusing capacity and gas exchange.

| <b>Table of Contents</b>                                                                                        | <b>Page</b> |
|-----------------------------------------------------------------------------------------------------------------|-------------|
| Search strategy                                                                                                 | 3           |
| Table S1: DL <sub>CO</sub> before and after Lung Volume Reduction Surgery (in %pred)                            | 4           |
| Table S2: DL <sub>CO</sub> before and after treatment with Endobronchial Valves                                 | 5           |
| Table S3: DL <sub>CO</sub> before and after LVRS (in ml/min/mmHg)                                               | 6           |
| Table S4: Variation in change in DL <sub>CO</sub> before and after Lung Volume Reduction Treatment              | 7           |
| Table S5: p(A-a)O <sub>2</sub> gradient before and after Lung Volume Reduction Treatment                        | 8           |
| Table S6: Change in DL <sub>CO</sub> , PaO <sub>2</sub> and p(A-a)O <sub>2</sub> gradient before and after LVRT | 9           |
| References                                                                                                      | 10          |

## Search Strategy

We performed a search for studies concerning lung volume reduction surgery and bronchoscopic lung volume reduction with endobronchial valves. If information on DL<sub>CO</sub>, p(A-a)O<sub>2</sub> gradient, PaO<sub>2</sub> combined with PaCO<sub>2</sub> before and after treatment was given, the article was included in the analysis

Suitability of the articles was screened by title and abstract. Clinical trials, observational studies and retrospective analyses were included. Other selection criteria were full text availability and text published in the English language.

The following search terms were used for bronchoscopic lung volume reduction with endobronchial valves: 'Endobronchial Valves'; 'Endobronchial Valve'; 'Lung Volume Reduction Valve'; Bronchial Valve'.

For studies concerning LVRS the search term 'Lung Volume Reduction Surgery' in title or abstract was used.

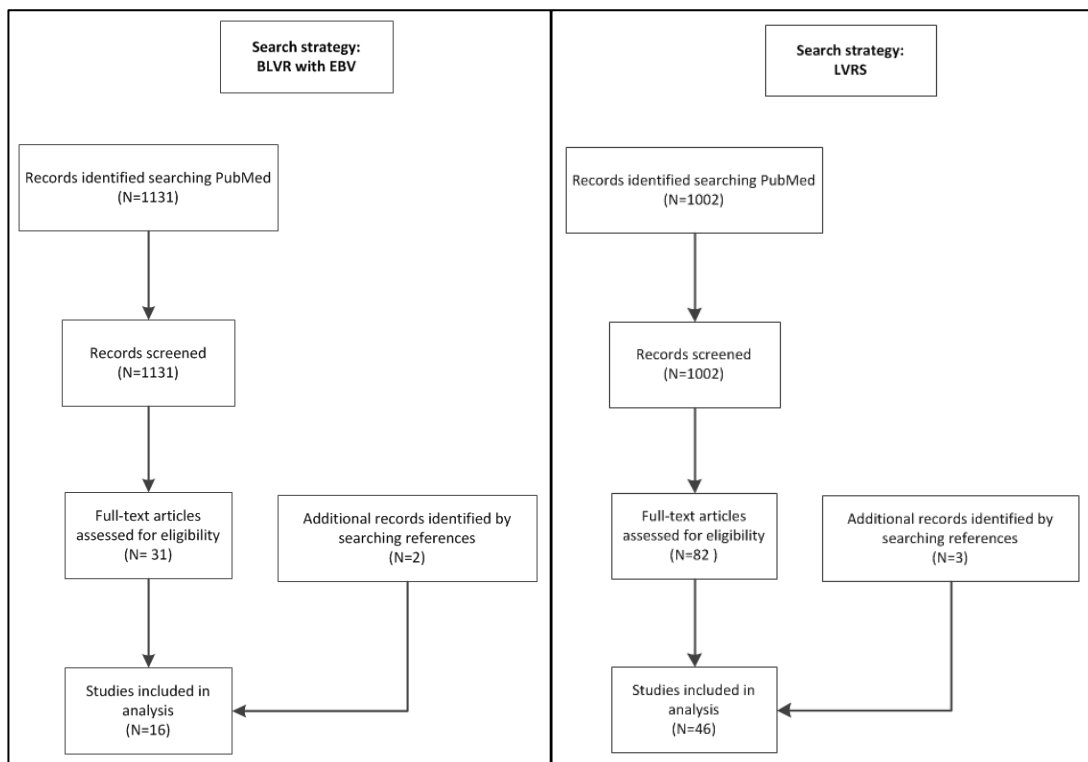

**Table S1: DL<sub>CO</sub> before and after Lung Volume Reduction Surgery**

| Study                    | Year | N (treated) | Interval (months) | Baseline DL <sub>CO</sub> (%pred) | Follow Up DL <sub>CO</sub> (%pred) | ΔDL <sub>CO</sub> (% absolute) | P-value |
|--------------------------|------|-------------|-------------------|-----------------------------------|------------------------------------|--------------------------------|---------|
| Sciurba <sup>1</sup>     | 1996 | 20          | 3                 | 44                                | 47                                 | 3                              | 0.15    |
| Brenner <sup>2</sup>     | 1997 | 145         | Unknown           | 28.5                              | 46.1                               | 17.6                           | <0.001  |
| Martinez <sup>3</sup>    | 1997 | 17          | 3 to 6            | 43.3                              | 48.2                               | 4.9                            | 0.13    |
| Gelb <sup>4</sup>        | 1998 | 12          | 12                | 18                                | 47                                 | 29                             | 0.004   |
| Norman <sup>5</sup>      | 1998 | 14          | 3                 | 20.8                              | 21.9                               | 1.1                            | NS      |
| Stammberger <sup>6</sup> | 1998 | 40          | 3                 | 44                                | 46                                 | 2                              | NS      |
| Oswald <sup>7</sup>      | 1998 | 9           | 3 to 6            | 46                                | 50                                 | 4                              | NS      |
| Gelb <sup>8</sup>        | 1999 | 6           | 27                | 35                                | 59                                 | 24                             | Unknown |
| O'Brien <sup>9</sup>     | 1999 | 41          | 3 to 6            | 33                                | 40                                 | 7                              | 0.07    |
| Geddes <sup>10</sup>     | 2000 | 24          | 12                | 36                                | 45                                 | 9                              | 0.11    |
| Homan <sup>11</sup>      | 2001 | 36          | 6                 | 38.7                              | 43.1                               | 4.4                            | 0.0046  |
| Bloch <sup>12</sup>      | 2002 | 115         | 3                 | 40                                | 43                                 | 3                              | <0.01   |
| Goldstein <sup>13</sup>  | 2003 | 28          | 12                | 35                                | 37                                 | 2                              | NS      |
| Ciccone <sup>14</sup>    | 2003 | 250         | 6                 | 34                                | 39                                 | 5                              | <0.001  |
| Tutic <sup>15</sup>      | 2004 | 21          | 6                 | 37                                | 40                                 | 3                              | NS      |
| Meyers <sup>16</sup>     | 2004 | 20          | 6                 | 16                                | 27                                 | 11                             | Unknown |
| Hardoff <sup>17</sup>    | 2005 | 35          | 12                | 44.2                              | 52.7                               | 8.5                            | NS      |
| Mineo <sup>18</sup>      | 2006 | 30          | 12                | 50.1                              | 59.3                               | 9.2                            | <0.01   |
| Weder <sup>19</sup>      | 2009 | 250         | 6                 | 39.4                              | 44.9                               | 5.5                            | NS      |
| Cremona <sup>20</sup>    | 2011 | 14          | Unknown           | 27                                | 37                                 | 10                             | 0.08    |
| Layton <sup>21</sup>     | 2015 | 10          | 7                 | 31                                | 33                                 | 2                              | 0.29    |
| Ginsburg <sup>22</sup>   | 2015 | 91          | 12                | 28.6                              | 33.8                               | 5.2                            | <0.001  |
| Clarenbach <sup>23</sup> | 2015 | 14          | 3                 | 35                                | 40                                 | 5                              | 0.061   |
| Sievi <sup>24</sup>      | 2016 | 12          | 3                 | 34                                | 37.7                               | 3.7                            | Unknown |
| Caviezel <sup>25</sup>   | 2018 | 30          | 3                 | 31.3                              | 26.7                               | -4.6                           | 0.686   |
| Caviezel <sup>26</sup>   | 2018 | 33          | 3                 | 15                                | 24                                 | 9                              | <0.001  |

DL<sub>CO</sub> = Diffusing Capacity of the Lung for Carbon Monoxide, NS = not significant. Baseline and follow up DL<sub>CO</sub> is given in percentage of predicted. Due to variable reporting of confidence intervals (i.e. standard deviation, interquartile range, minimum-maximum) these values are not reported in this table.

**Table S2: DL<sub>CO</sub> before and after Endoscopic Lung Volume Reduction with Endobronchial Valves**

| Study                   | Year | N (Treated) | Interval (months) | Baseline DLco (%pred) | Follow Up DLco (%pred) | ΔDL <sub>CO</sub> (absolute %) | P-value |
|-------------------------|------|-------------|-------------------|-----------------------|------------------------|--------------------------------|---------|
| Toma <sup>27</sup>      | 2003 | 8           | 1                 | 35.6                  | 45.8                   | 10.2                           | 0.02    |
| Snell <sup>28</sup>     | 2003 | 10          | 1                 | 31                    | 34.3                   | 3.3                            | 0.04    |
| Yim <sup>29</sup>       | 2004 | 21          | 3                 | 50.8                  | 60.6                   | 9.8                            | 0.43    |
| Hopkinson <sup>30</sup> | 2005 | 19          | 1                 | 35.9                  | 40.9                   | 5                              | 0.02    |
| Venuta <sup>31</sup>    | 2005 | 13          | 3                 | 33                    | 50                     | 17                             | 0.01    |
| Wan <sup>32</sup>       | 2006 | 98          | 3                 | 32.7                  | 36.8                   | 4.1                            | 0.06    |
| Chung <sup>33</sup>     | 2010 | 7           | 3                 | 38                    | 38                     | 0                              | 0.34    |
| Kotecha <sup>34</sup>   | 2011 | 16          | 1                 | 34.7                  | 39.5                   | 4.8                            | 0.02    |
| Hillerdal <sup>35</sup> | 2014 | 15          | 6                 | 28                    | 38                     | 10                             | Unknown |
| Klooster <sup>36</sup>  | 2015 | 22          | 6                 | 40.9                  | 44.2                   | 3.3                            | 0.021   |
| Park <sup>37</sup>      | 2015 | 43          | 6                 | 31.6                  | 34.3                   | 2.7                            | <0.05   |
| Fiorelli <sup>38</sup>  | 2016 | 49          | 6                 | 52                    | 54.7                   | 2.7                            | 0.7     |
| Fiorelli <sup>39</sup>  | 2017 | 33          | 3                 | 58                    | 59                     | 1                              | 0.91    |
| Kemp <sup>40</sup>      | 2017 | 65          | 6                 | 32.3                  | 33.6                   | 1.3                            | 0.004   |
| Criner <sup>41</sup>    | 2018 | 128         | 12                | 34.6                  | 36.4                   | 1.8                            | 0.013   |

DL<sub>CO</sub> = Diffusing Capacity of the Lung for Carbon Monoxide. Baseline and follow up DL<sub>CO</sub> is given in percentage of predicted. Due to variable reporting of confidence intervals (i.e. standard deviation, interquartile range, minimum-maximum) these values are not reported in this table.

**Table S3: DL<sub>CO</sub> before and after LVRS (in ml/min/mmHg)**

| <b>Study</b>                 | <b>Year</b> | <b>N (treated)</b> | <b>Interval (months)</b> | <b>Baseline DLco (ml/min/mmHg)</b> | <b>Follow Up DLco (ml/min/mmHg)</b> | <b>ΔDL<sub>CO</sub> (absolute)</b> | <b>P-value</b> |
|------------------------------|-------------|--------------------|--------------------------|------------------------------------|-------------------------------------|------------------------------------|----------------|
| <b>Ferguson<sup>42</sup></b> | 1998        | 18                 | 3-6                      | 10.59                              | 10.19                               | -0.40                              | NS             |
| <b>Albert<sup>43</sup></b>   | 1998        | 46                 | 3                        | 7.44                               | 9.44                                | 2                                  | <0.05          |
| <b>Fujimoto<sup>44</sup></b> | 1999        | 12                 | 6                        | 11.2                               | 14.5                                | 3.3                                | <0.05          |
| <b>Kuwahira<sup>45</sup></b> | 2000        | 20                 | 6                        | 9.03                               | 8.96                                | -0.07                              | NS             |
| <b>Miller<sup>46</sup></b>   | 2005        | 54                 | 6                        | 7.58                               | 8.69                                | 1.11                               | 0.144          |

**NS = Not significant**

**Table S4: Variation in change in DL<sub>CO</sub> before and after Lung Volume Reduction Treatment**

**2a. Absolute change in DL<sub>CO</sub> (%pred)**

| Study                    | Year | Treatment | n<br>(Treated) | ΔDL <sub>CO</sub><br>(Abs. change in %pred) |
|--------------------------|------|-----------|----------------|---------------------------------------------|
| Oswald <sup>7</sup>      | 1998 | LVRS      | 9              | 4 (-9 to +34)                               |
| Gelb <sup>8</sup>        | 1999 | LVRS      | 6              | 23 (-6.0 to +29)                            |
| Wan <sup>32</sup>        | 2006 | BLVR      | 98             | 17.2±52                                     |
| Clarenbach <sup>23</sup> | 2015 | LVRS      | 14             | 5.0 [1.0 to 7.0]                            |
| Kemp <sup>40</sup>       | 2017 | BLVR      | 65             | 2.78±8.84                                   |
| Criner <sup>41</sup>     | 2018 | BLVR      | 128            | 1.8±8.44                                    |

**2b. Relative change in DL<sub>CO</sub> (%pred)**

| Study                | Year | Treatment | n<br>(Treated) | ΔDL <sub>CO</sub> (%) |
|----------------------|------|-----------|----------------|-----------------------|
| Albert <sup>43</sup> | 1998 | LVRS      | 46             | 24±54                 |
| O'Brien <sup>9</sup> | 1999 | LVRS      | 41             | 8.5±45                |
| Meyers <sup>16</sup> | 2004 | LVRS      | 20             | 70±82                 |

**2c. Absolute change in DL<sub>CO</sub> (ml/min/mmHg)**

| Study               | Year | Treatment | n<br>(Treated) | ΔDL <sub>CO</sub><br>(ml/min/mmHg) |
|---------------------|------|-----------|----------------|------------------------------------|
| Homan <sup>11</sup> | 2001 | LVRS      | 36             | 0.96±1.831                         |
| Snell <sup>28</sup> | 2003 | BLVR      | 10             | 0.45 (-0.6 to 2.2)                 |

Table S4. 2a: Change in DL<sub>CO</sub> represented as absolute change in percentage of predicted. S4b: Change in DL<sub>CO</sub> represented as relative change in percentage of predicted. S4c: Change in DL<sub>CO</sub> represented as absolute change in ml/min/mmHg. Data represented as either mean±SD; median (min-max) or median [IQR]. LVRS=Lung Volume Reduction Surgery, BLVR=Bronchoscopic lung volume reduction.

**Table S5: p(A-a)O<sub>2</sub> gradient before and after Lung Volume Reduction Treatment**

| Study                    | Year | Type LVR | N treat | Baseline p(A-a)O <sub>2</sub> gr (kPa) | Follow up p(A-a)O <sub>2</sub> gr (kPa) | Δ p(A-a)O <sub>2</sub> gr |
|--------------------------|------|----------|---------|----------------------------------------|-----------------------------------------|---------------------------|
| Snell <sup>28</sup>      | 2003 | BLVR     | 10      | 3.2                                    | 3.2                                     | 0.0                       |
| Venuta <sup>31</sup>     | 2005 | BLVR     | 13      | 2.5                                    | 3.3                                     | 0.8                       |
| Venuta <sup>47</sup>     | 2012 | BLVR     | 40      | 3.4                                    | 3.4                                     | 0.0                       |
| Fiorelli <sup>38</sup>   | 2016 | BLVR     | 49      | 4.2                                    | 3.3                                     | -0.9                      |
| Fiorelli <sup>39</sup>   | 2017 | BLVR     | 33      | 3.9                                    | 4.1                                     | 0.2                       |
| Cooper <sup>48</sup>     | 1995 | LVRS     | 20      | 4.8                                    | 4.2                                     | -0.6                      |
| Cooper <sup>49</sup>     | 1996 | LVRS     | 150     | 4.7                                    | 4.2                                     | -0.5                      |
| Sciurba <sup>1</sup>     | 1196 | LVRS     | 20      | 4.2                                    | 4.5                                     | 0.3                       |
| Roue <sup>50</sup>       | 1996 | LVRS     | 13      | 5.3                                    | 5.0                                     | -0.3                      |
| Ferguson <sup>42</sup>   | 1998 | LVRS     | 18      | 6.7                                    | 7.1                                     | 0.4                       |
| Date <sup>51</sup>       | 1998 | LVRS     | 39      | 3.4                                    | 3.1                                     | -0.3                      |
| Cassina <sup>52</sup>    | 1998 | LVRS     | 30      | 5.0                                    | 4.4                                     | -0.6                      |
| Albert <sup>43</sup>     | 1998 | LVRS     | 46      | 4.0                                    | 4.1                                     | 0.1                       |
| Gelb <sup>4</sup>        | 1998 | LVRS     | 12      | 3.9                                    | 3.6                                     | -0.3                      |
| Norman <sup>5</sup>      | 1998 | LVRS     | 14      | 4.8                                    | 3.7                                     | -1.1                      |
| Stammberger <sup>6</sup> | 1998 | LVRS     | 40      | 4.1                                    | 3.9                                     | -0.2                      |
| Oswald <sup>7</sup>      | 1998 | LVRS     | 9       | 3.2                                    | 3.4                                     | 0.2                       |
| Shade <sup>53</sup>      | 1999 | LVRS     | 33      | 3.6                                    | 3.2                                     | -0.4                      |
| Fujimoto <sup>44</sup>   | 1999 | LVRS     | 12      | 4.2                                    | 3.6                                     | -0.6                      |
| Leyenson <sup>54</sup>   | 2000 | LVRS     | 42      | 3.0                                    | 4.6                                     | 1.6                       |
| Malthaner <sup>55</sup>  | 2000 | LVRS     | 24      | 3.9                                    | 4.7                                     | 0.8                       |
| Geddes <sup>10</sup>     | 2000 | LVRS     | 24      | 3.9                                    | 2.8                                     | -1.1                      |
| Pompeo <sup>56</sup>     | 2000 | LVRS     | 30      | 4.1                                    | 3.8                                     | -0.3                      |
| Kuwahira <sup>45</sup>   | 2000 | LVRS     | 20      | 4.1                                    | 3.8                                     | -0.3                      |
| Cassart <sup>57</sup>    | 2001 | LVRS     | 11      | 5.0                                    | 4.4                                     | -0.6                      |
| Bloch <sup>12</sup>      | 2002 | LVRS     | 115     | 5.0                                    | 4.9                                     | -0.1                      |
| Ciccione <sup>14</sup>   | 2003 | LVRS     | 250     | 4.5                                    | 3.9                                     | -0.6                      |
| Takayama <sup>58</sup>   | 2003 | LVRS     | 23      | 3.8                                    | 3.2                                     | -0.6                      |
| Tutic <sup>15</sup>      | 2004 | LVRS     | 21      | 5.8                                    | 4.9                                     | -0.9                      |
| Meyers <sup>16</sup>     | 2004 | LVRS     | 20      | 4.8                                    | 4.7                                     | -0.1                      |
| Hillerdal <sup>35</sup>  | 2005 | LVRS     | 53      | 4.5                                    | 4.5                                     | 0                         |
| Cremona <sup>20</sup>    | 2011 | LVRS     | 14      | 4.3                                    | 4.2                                     | -0.1                      |
| Pompeo <sup>59</sup>     | 2012 | LVRS     | 63      | 4.1                                    | 4.0                                     | -0.1                      |
| Dauriat <sup>60</sup>    | 2016 | LVRS     | 52      | 4.4                                    | 4.0                                     | -0.4                      |
| Caviezel <sup>25</sup>   | 2018 | LVRS     | 30      | 5.2                                    | 4.7                                     | -0.5                      |
| You <sup>61</sup>        | 2018 | LVRS     | 15      | 0.3                                    | 0.6                                     | 0.3                       |

LVRS=Lung Volume Reduction Surgery. BLVR = Bronchoscopic Lung Volume Reduction.



**Table S6: Change in DL<sub>CO</sub>, PaO<sub>2</sub> and p(A-a)O<sub>2</sub> gradient before and after LVRT**

| Study                   | Year | Type LVR | N treat | ΔDL <sub>CO</sub> (%pred) | Δ PaO <sub>2</sub> (kPa) | Baseline p(A-a)O <sub>2</sub> gradient (kPa) | Follow up p(A-a)O <sub>2</sub> gradient (kPa) | Δ p(A-a)O <sub>2</sub> gradient |
|-------------------------|------|----------|---------|---------------------------|--------------------------|----------------------------------------------|-----------------------------------------------|---------------------------------|
| Snell <sup>28</sup>     | 2003 | BLVR     | 10      | 3.3                       | 0.15                     | 3.2                                          | 3.2                                           | 0                               |
| Venuta <sup>31</sup>    | 2005 | BLVR     | 13      | 17                        | -0.4                     | 2.5                                          | 3.3                                           | 0.8                             |
| Fiorelli <sup>38</sup>  | 2016 | BLVR     | 49      | 2.7                       | 1                        | 4.2                                          | 3.3                                           | -0.9                            |
| Fiorelli <sup>39</sup>  | 2017 | BLVR     | 33      | 1                         | 0                        | 3.9                                          | 4.1                                           | 0.2                             |
| Scirba <sup>1</sup>     | 1996 | LVRS     | 20      | 3                         | 0.3                      | 4.2                                          | 4.5                                           | 0.3                             |
| Gelb <sup>4</sup>       | 1998 | LVRS     | 12      | 29                        | 1.3                      | 3.9                                          | 3.6                                           | -0.3                            |
| Norman <sup>5</sup>     | 1998 | LVRS     | 14      | 1.1                       | 1.1                      | 4.8                                          | 3.7                                           | -1.1                            |
| Stamberger <sup>6</sup> | 1998 | LVRS     | 40      | 2.0                       | 0.8                      | 4.1                                          | 3.9                                           | -0.2                            |
| Oswald <sup>7</sup>     | 1998 | LVRS     | 9       | 4.0                       | 0                        | 3.2                                          | 3.4                                           | 0.2                             |
| Geddes <sup>10</sup>    | 2000 | LVRS     | 24      | 9                         | 0.4                      | 3.9                                          | 2.8                                           | -1.1                            |
| Bloch <sup>12</sup>     | 2002 | LVRS     | 115     | 3                         | 0.3                      | 5                                            | 4.9                                           | -0.1                            |
| Ciccione <sup>14</sup>  | 2003 | LVRS     | 250     | 5                         | 1.1                      | 4.5                                          | 3.9                                           | -0.6                            |
| Tutic <sup>15</sup>     | 2004 | LVRS     | 21      | 3                         | 0.5                      | 5.8                                          | 4.9                                           | -0.9                            |
| Meyers <sup>16</sup>    | 2004 | LVRS     | 20      | 11                        | 1.2                      | 4.8                                          | 4.7                                           | -0.1                            |
| Cremona <sup>20</sup>   | 2011 | LVRS     | 14      | 10                        | 0.7                      | 4.3                                          | 4.2                                           | -0.1                            |
| Caviezel <sup>25</sup>  | 2018 | LVRS     | 30      | -4.6                      | 0.4                      | 5.2                                          | 4.7                                           | -0.5                            |

LVRS=Lung Volume Reduction Surgery. BLVR = Bronchoscopic Lung Volume Reduction.

## References

1. Sciruba FC, Rogers RM, Keenan RJ, et al. Improvement in pulmonary function and elastic recoil after lung-reduction surgery for diffuse emphysema. *N Engl J Med*. 1996;334(17):1095-1099.
2. Brenner M, McKenna RJ, Gelb AF, et al. Dyspnea response following bilateral thoracoscopic staple lung volume reduction surgery. *Chest*. 1997;112(4):916-923.
3. Martinez FJ, de Oca MM, Whyte RI, Stetz J, Gay SE, Celli BR. Lung-volume reduction improves dyspnea, dynamic hyperinflation, and respiratory muscle function. *Am J Respir Crit Care Med*. 1997;155(6):1984-1990.
4. Gelb AF, Brenner M, McKenna RJ, Jr, Fischel R, Zamel N, Schein MJ. Serial lung function and elastic recoil 2 years after lung volume reduction surgery for emphysema. *Chest*. 1998;113(6):1497-1506.
5. Norman M, Hillerdal G, Orre L, et al. Improved lung function and quality of life following increased elastic recoil after lung volume reduction surgery in emphysema. *Respir Med*. 1998;92(4):653-658.
6. Stammberger U, Bloch KE, Thurnheer R, Bingisser R, Weder W, Russi EW. Exercise performance and gas exchange after bilateral video-assisted thoracoscopic lung volume reduction for severe emphysema. *Eur Respir J*. 1998;12(4):785-792.
7. Oswald-Mammosser M, Kessler R, Massard G, Wihlm JM, Weitzenblum E, Lonsdorfer J. Effect of lung volume reduction surgery on gas exchange and pulmonary hemodynamics at rest and during exercise. *Am J Respir Crit Care Med*. 1998;158(4):1020-1025.
8. Gelb AF, McKenna RJ, Brenner M, Fischel R, Zamel N. Lung function after bilateral lower lobe lung volume reduction surgery for alpha1-antitrypsin emphysema. *Eur Respir J*. 1999;14(4):928-933.

9. O'Brien GM, Furukawa S, Kuzma AM, Cordova F, Criner GJ. Improvements in lung function, exercise, and quality of life in hypercapnic COPD patients after lung volume reduction surgery. *Chest*. 1999;115(1):75-84.
10. Geddes D, Davies M, Koyama H, et al. Effect of lung-volume-reduction surgery in patients with severe emphysema. *N Engl J Med*. 2000;343(4):239-245.
11. Homan S, Porter S, Peacock M, Saccoia N, Southcott AM, Ruffin R. Increased effective lung volume following lung volume reduction surgery in emphysema. *Chest*. 2001;120(4):1157-1162.
12. Bloch KE, Georgescu CL, Russi EW, Weder W. Gain and subsequent loss of lung function after lung volume reduction surgery in cases of severe emphysema with different morphologic patterns. *J Thorac Cardiovasc Surg*. 2002;123(5):845-854.
13. Goldstein RS, Todd TR, Guyatt G, et al. Influence of lung volume reduction surgery (LVRS) on health related quality of life in patients with chronic obstructive pulmonary disease. *Thorax*. 2003;58(5):405-410.
14. Ciccone AM, Meyers BF, Guthrie TJ, et al. Long-term outcome of bilateral lung volume reduction in 250 consecutive patients with emphysema. *J Thorac Cardiovasc Surg*. 2003;125(3):513-525.
15. Tutic M, Bloch KE, Lardinois D, Brack T, Russi EW, Weder W. Long-term results after lung volume reduction surgery in patients with alpha1-antitrypsin deficiency. *J Thorac Cardiovasc Surg*. 2004;128(3):408-413.
16. Meyers BF, Yusef RD, Guthrie TJ, et al. Results of lung volume reduction surgery in patients meeting a national emphysema treatment trial high-risk criterion. *J Thorac Cardiovasc Surg*. 2004;127(3):829-835.

17. Hardoff R, Shitrit D, Tamir A, Steinmetz AP, Krausz Y, Kramer MR. Short- and long-term outcome of lung volume reduction surgery. the predictive value of the preoperative clinical status and lung scintigraphy. *Respir Med*. 2006;100(6):1041-1049.
18. Mineo TC, Pompeo E, Mineo D, Ambrogi V, Ciarapica D, Polito A. Resting energy expenditure and metabolic changes after lung volume reduction surgery for emphysema. *Ann Thorac Surg*. 2006;82(4):1205-1211.
19. Weder W, Tutic M, Lardinois D, et al. Persistent benefit from lung volume reduction surgery in patients with homogeneous emphysema. *Ann Thorac Surg*. 2009;87(1):229-36; discussion 236-7.
20. Cremona G, Barbera JA, Melgosa T, et al. Mechanisms of gas exchange response to lung volume reduction surgery in severe emphysema. *J Appl Physiol (1985)*. 2011;110(4):1036-1045.
21. Layton AM, Armstrong HF, Moran SL, et al. Quantification of improvements in static and dynamic ventilatory measures following lung volume reduction surgery for severe COPD. *Chronic Obstr Pulm Dis*. 2015;2(1):61-69.
22. Ginsburg ME, Thomashow BM, Bulman WA, et al. The safety, efficacy, and durability of lung-volume reduction surgery: A 10-year experience. *J Thorac Cardiovasc Surg*. 2016;151(3):717-724.e1.
23. Clarenbach CF, Sievi NA, Brock M, Schneiter D, Weder W, Kohler M. Lung volume reduction surgery and improvement of endothelial function and blood pressure in patients with chronic obstructive pulmonary disease. A randomized controlled trial. *Am J Respir Crit Care Med*. 2015;192(3):307-314.
24. Sievi NA, Clarenbach CF, Kohler M. Chronic obstructive pulmonary disease and cardiac repolarization: Data from a randomized controlled trial. *Respiration*. 2016;91(4):288-295.

25. Caviezel C, Aruldas C, Franzen D, et al. Lung volume reduction surgery in selected patients with emphysema and pulmonary hypertension. *Eur J Cardiothorac Surg*. 2018;54(3):565-571.
26. Caviezel C, Schaffter N, Schneiter D, et al. Outcome after lung volume reduction surgery in patients with severely impaired diffusion capacity. *Ann Thorac Surg*. 2018;105(2):379-385.
27. Toma TP, Hopkinson NS, Hillier J, et al. Bronchoscopic volume reduction with valve implants in patients with severe emphysema. *Lancet*. 2003;361(9361):931-933.
28. Snell GI, Holsworth L, Borrill ZL, et al. The potential for bronchoscopic lung volume reduction using bronchial prostheses: A pilot study. *Chest*. 2003;124(3):1073-1080.
29. Yim AP, Hwong TM, Lee TW, et al. Early results of endoscopic lung volume reduction for emphysema. *J Thorac Cardiovasc Surg*. 2004;127(6):1564-1573.
30. Hopkinson NS, Toma TP, Hansell DM, et al. Effect of bronchoscopic lung volume reduction on dynamic hyperinflation and exercise in emphysema. *Am J Respir Crit Care Med*. 2005;171(5):453-460.
31. Venuta F, de Giacomo T, Rendina EA, et al. Bronchoscopic lung-volume reduction with one-way valves in patients with heterogenous emphysema. *Ann Thorac Surg*. 2005;79(2):411-6; discussion 416-7.
32. Wan IY, Toma TP, Geddes DM, et al. Bronchoscopic lung volume reduction for end-stage emphysema: Report on the first 98 patients. *Chest*. 2006;129(3):518-526.
33. Chung SC, Peters MJ, Chen S, Emmett L, Ing AJ. Effect of unilateral endobronchial valve insertion on pulmonary ventilation and perfusion: A pilot study. *Respirology*. 2010;15(7):1079-1083.
34. Kotecha S, Westall GP, Holsworth L, Pham A, Williams TJ, Snell GI. Long-term outcomes from bronchoscopic lung volume reduction using a bronchial prosthesis. *Respirology*. 2011;16(1):167-173.

35. Hillerdal G, Lofdahl CG, Strom K, et al. Comparison of lung volume reduction surgery and physical training on health status and physiologic outcomes: A randomized controlled clinical trial. *Chest*. 2005;128(5):3489-3499.
36. Klooster K, ten Hacken NH, Hartman JE, Kerstjens HA, van Rikxoort EM, Slebos DJ. Endobronchial valves for emphysema without interlobar collateral ventilation. *N Engl J Med*. 2015;373(24):2325-2335.
37. Park TS, Hong Y, Lee JS, et al. Efficacy of bronchoscopic lung volume reduction by endobronchial valves in patients with heterogeneous emphysema: Report on the first asian cases. *J Korean Med Sci*. 2014;29(10):1404-1410.
38. Fiorelli A, D'Andrilli A, Anile M, et al. Sequential bilateral bronchoscopic lung volume reduction with one-way valves for heterogeneous emphysema. *Ann Thorac Surg*. 2016;102(1):287-294.
39. Fiorelli A, Santoriello C, De Felice A, et al. Bronchoscopic lung volume reduction with endobronchial valves for heterogeneous emphysema: Long-term results. *J Vis Surg*. 2017;3:170.
40. Kemp SV, Slebos DJ, Kirk A, et al. A multicenter randomized controlled trial of zephyr endobronchial valve treatment in heterogeneous emphysema (TRANSFORM). *Am J Respir Crit Care Med*. 2017;196(12):1535-1543.
41. Criner GJ, Sue R, Wright S, et al. A multicenter randomized controlled trial of zephyr endobronchial valve treatment in heterogeneous emphysema (LIBERATE). *Am J Respir Crit Care Med*. 2018;198(9):1151-1164.
42. Ferguson GT, Fernandez E, Zamora MR, Pomerantz M, Buchholz J, Make BJ. Improved exercise performance following lung volume reduction surgery for emphysema. *Am J Respir Crit Care Med*. 1998;157(4 Pt 1):1195-1203.

43. Albert RK, Benditt JO, Hildebrandt J, Wood DE, Hlastala MP. Lung volume reduction surgery has variable effects on blood gases in patients with emphysema. *Am J Respir Crit Care Med*. 1998;158(1):71-76.
44. Fujimoto K, Kubo K, Haniuda M, Matsuzawa Y, Yamanda T, Maruyama Y. Improvements in thoracic movement following lung volume reduction surgery in patients with severe emphysema. *Intern Med*. 1999;38(2):119-125.
45. Kuwahira I, Iwasaki M, Kaga K, et al. Effectiveness of the fold plication method in lung volume reduction surgery. *Intern Med*. 2000;39(5):381-384.
46. Miller JD, Berger RL, Malthaner RA, et al. Lung volume reduction surgery vs medical treatment: For patients with advanced emphysema. *Chest*. 2005;127(4):1166-1177.
47. Venuta F, Anile M, Diso D, et al. Long-term follow-up after bronchoscopic lung volume reduction in patients with emphysema. *Eur Respir J*. 2012;39(5):1084-1089.
48. Cooper JD, Trulock EP, Triantafillou AN, et al. Bilateral pneumectomy (volume reduction) for chronic obstructive pulmonary disease. *J Thorac Cardiovasc Surg*. 1995;109(1):106-116; discussion 116-9.
49. Cooper JD, Patterson GA, Sundaresan RS, et al. Results of 150 consecutive bilateral lung volume reduction procedures in patients with severe emphysema. *J Thorac Cardiovasc Surg*. 1996;112(5):1319-29; discussion 1329-30.
50. Roue C, Mal H, Sleiman C, et al. Lung volume reduction in patients with severe diffuse emphysema. A retrospective study. *Chest*. 1996;110(1):28-34.
51. Date H, Goto K, Souda R, et al. Bilateral lung volume reduction surgery via median sternotomy for severe pulmonary emphysema. *Ann Thorac Surg*. 1998;65(4):939-942.

52. Cassina PC, Teschler H, Konietzko N, Theegarten D, Stamatis G. Two-year results after lung volume reduction surgery in alpha1-antitrypsin deficiency versus smoker's emphysema. *Eur Respir J*. 1998;12(5):1028-1032.
53. Shade D, Jr, Cordova F, Lando Y, et al. Relationship between resting hypercapnia and physiologic parameters before and after lung volume reduction surgery in severe chronic obstructive pulmonary disease. *Am J Respir Crit Care Med*. 1999;159(5 Pt 1):1405-1411.
54. Leyenson V, Furukawa S, Kuzma AM, Cordova F, Travaline J, Criner GJ. Correlation of changes in quality of life after lung volume reduction surgery with changes in lung function, exercise, and gas exchange. *Chest*. 2000;118(3):728-735.
55. Malthaner RA, Miller JD. Lung volume reduction surgery: Results of a canadian pilot study. canadian lung volume reduction surgery study group. *Can J Surg*. 2000;43(5):377-383.
56. Pompeo E, Marino M, Nofroni I, Matteucci G, Mineo TC. Reduction pneumoplasty versus respiratory rehabilitation in severe emphysema: A randomized study. pulmonary emphysema research group. *Ann Thorac Surg*. 2000;70(3):948-53; discussion 954.
57. Cassart M, Hamacher J, Verbandt Y, et al. Effects of lung volume reduction surgery for emphysema on diaphragm dimensions and configuration. *Am J Respir Crit Care Med*. 2001;163(5):1171-1175.
58. Takayama T, Shindoh C, Kurokawa Y, et al. Effects of lung volume reduction surgery for emphysema on oxygen cost of breathing. *Chest*. 2003;123(6):1847-1852.
59. Pompeo E, Rogliani P, Tacconi F, et al. Randomized comparison of awake nonresectional versus nonawake resectional lung volume reduction surgery. *J Thorac Cardiovasc Surg*. 2012;143(1):47-54, 54.e1.



60. Dauriat G, Mal H, Jebrak G, et al. Functional results of unilateral lung volume reduction surgery in alpha1-antitrypsin deficient patients. *Int J Chron Obstruct Pulmon Dis*. 2006;1(2):201-206.

61. You B, Zhao Y, Hou S, Hu B, Li H. Lung volume reduction surgery in hypercapnic patients: A single-center experience from china. *J Thorac Dis*. 2018;10(Suppl 23):S2698-S2703.
